# Supplementary material for: Quantitative assessment of the effect of pre-gestational diabetes and risk of adverse maternal, perinatal and neonatal outcomes
Source: PubMed Central journal article supplement (PMC5617405; doi:10.18632/oncotarget.17824), 2017-05-11
Supplement: oncotarget-08-61048-s001.pdf [file oncotarget-08-61048-s001.pdf]

# Quantitative assessment of the effect of pre-gestational diabetes and risk of adverse maternal, perinatal and neonatal outcomes

## SUPPLEMENTARY MATERIALS

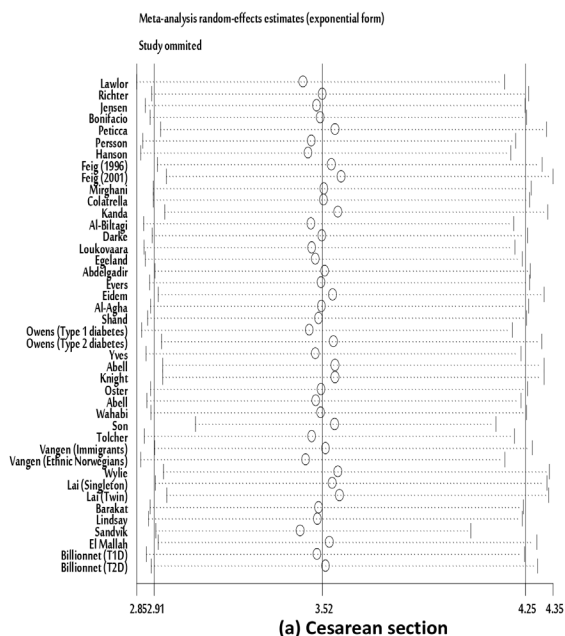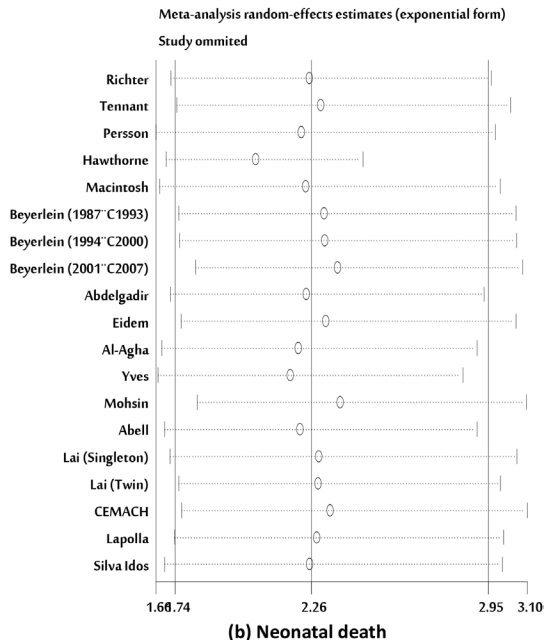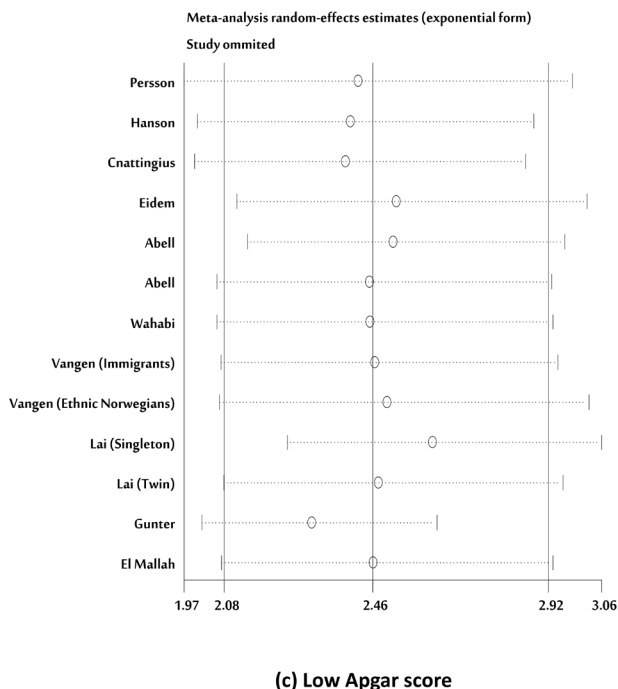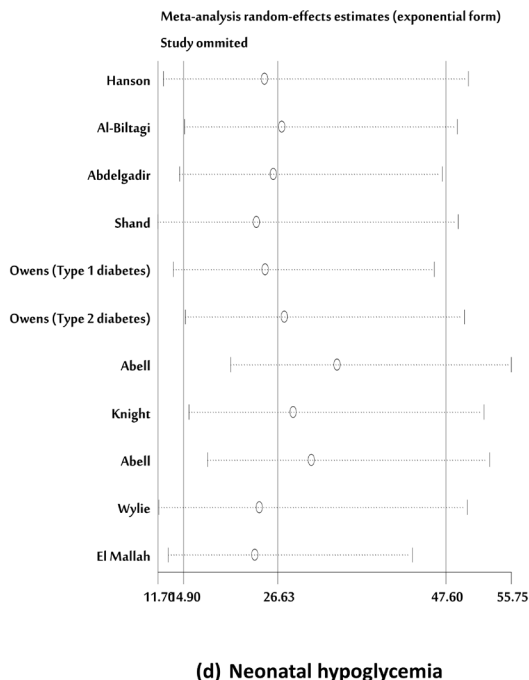

(Continued)

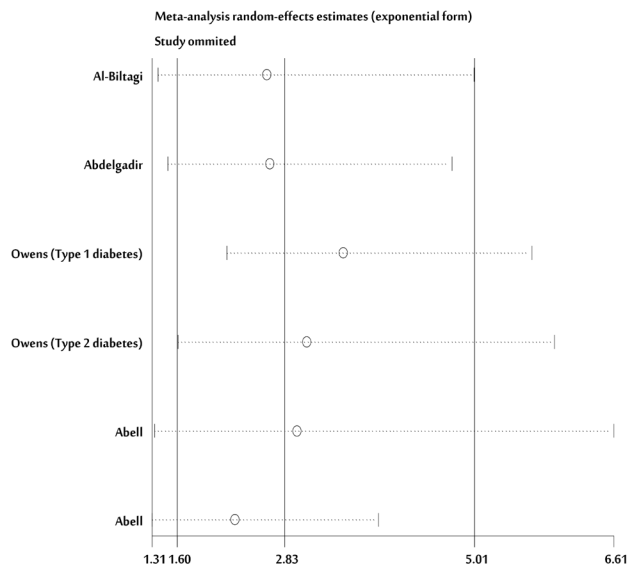

(e) Jaundice

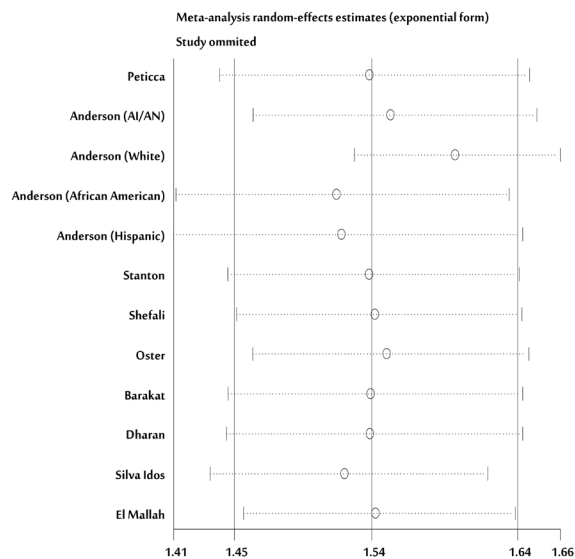

(f) Low birth weight

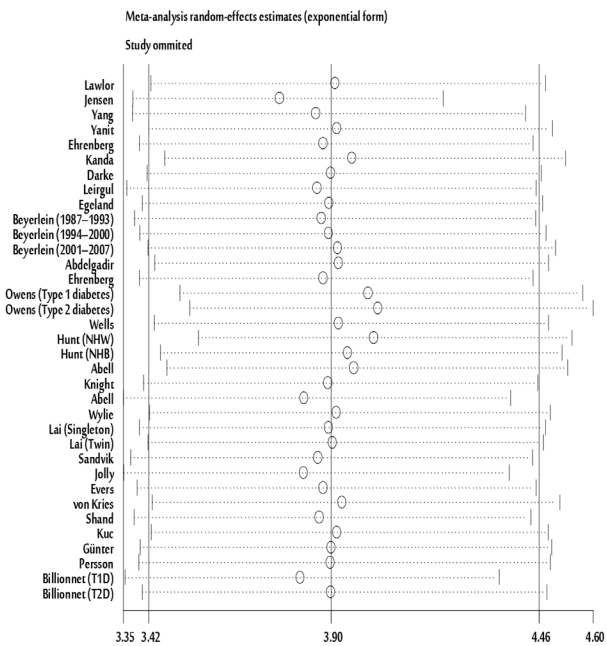

(g) Large for gestational age

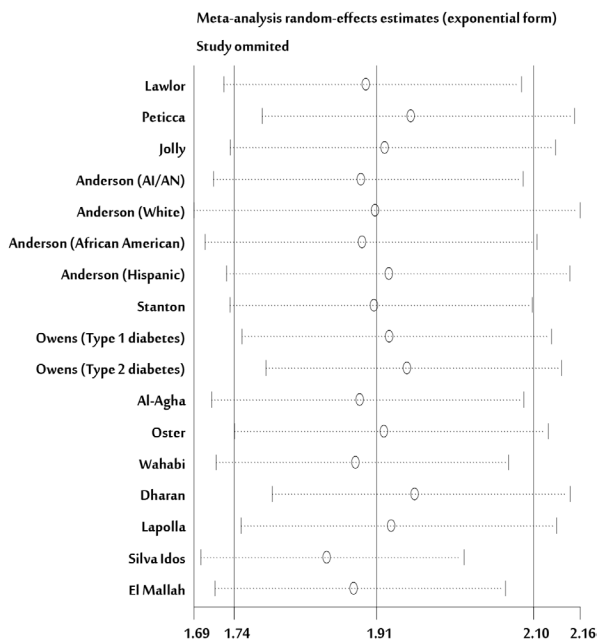

(h) Macrosomia

(Continued)

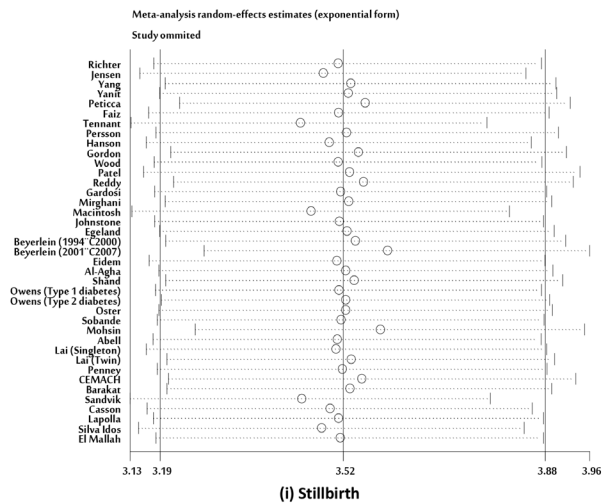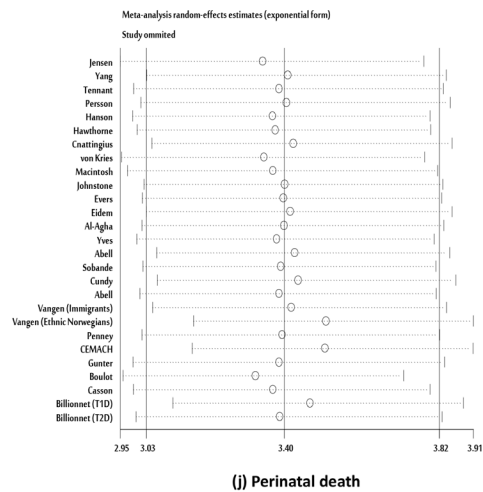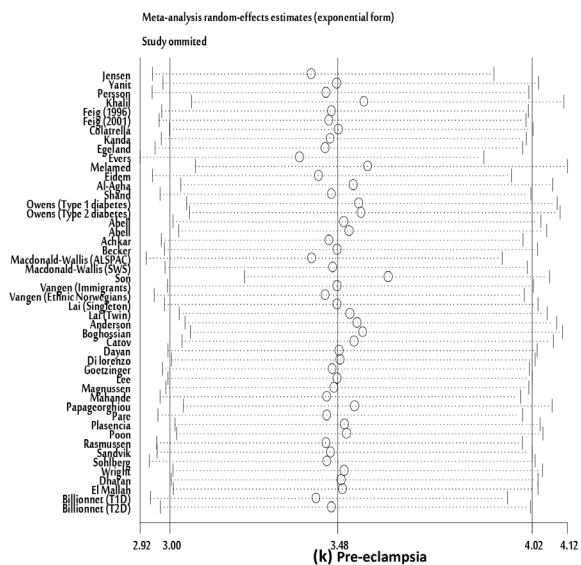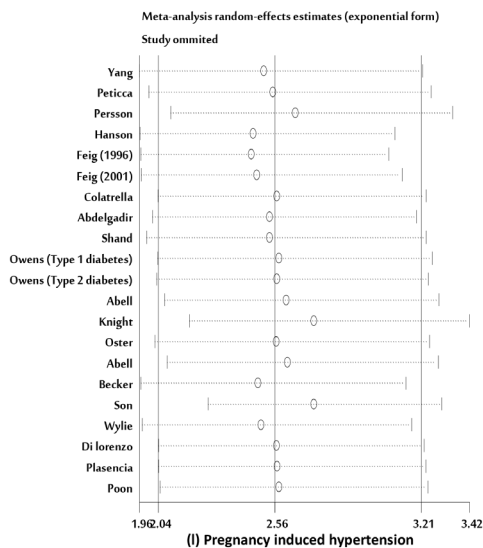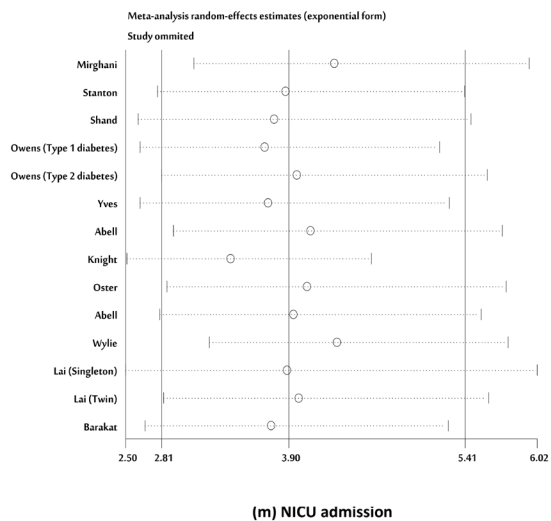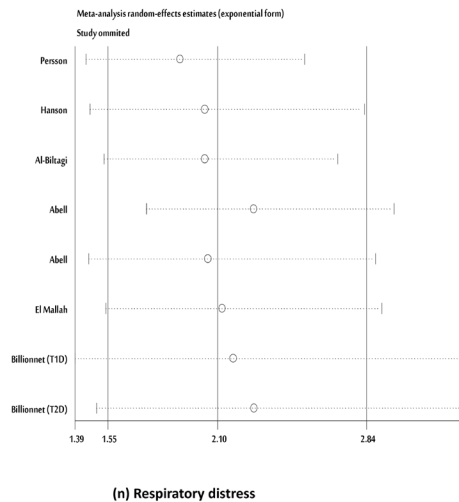

(Continued)

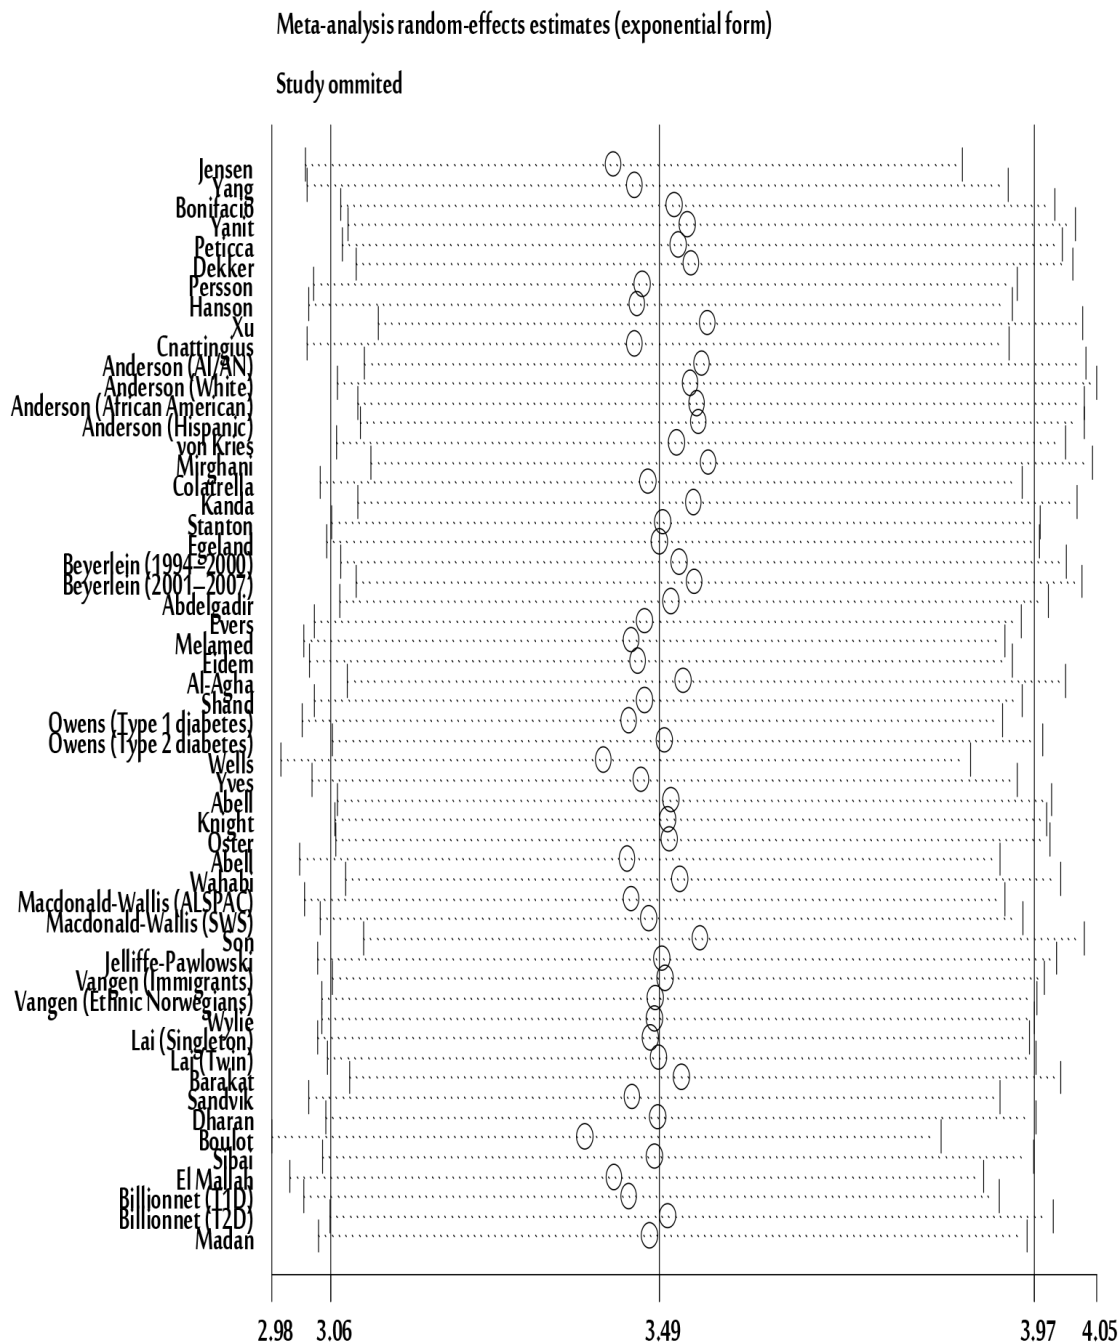

(q) Preterm delivery

Supplementary Figure 1: Result of sensitivity analyses for pre-gestational diabetes and adverse pregnancy risk.

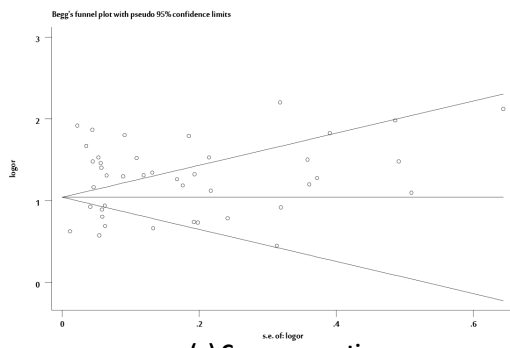

(a) Cesarean section

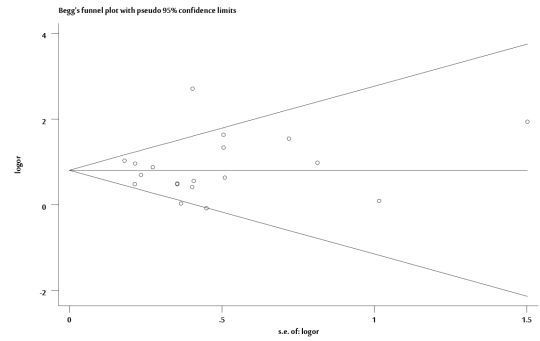

(b) Neonatal death

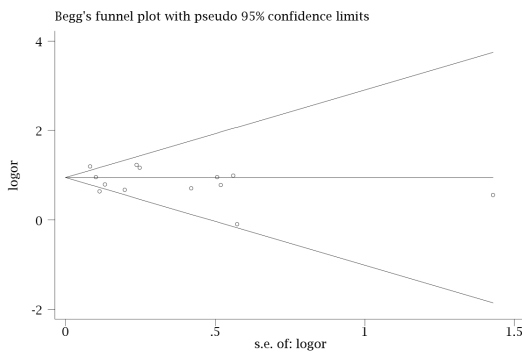

(c) Low Apgar score

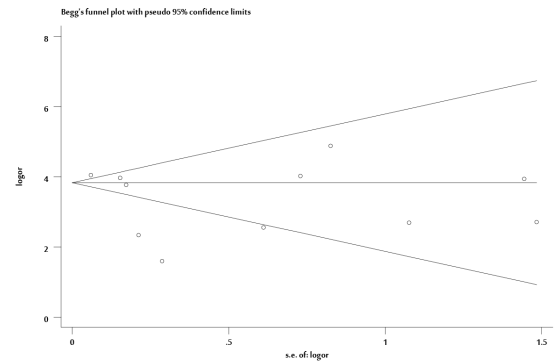

(d) Neonatal hypoglycemia

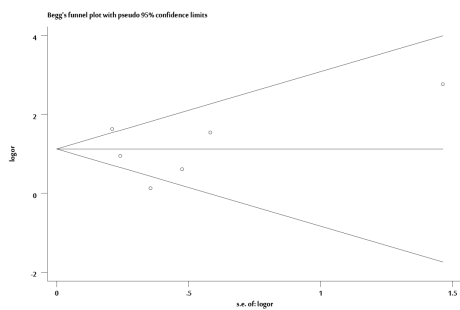

(e) Jaundice

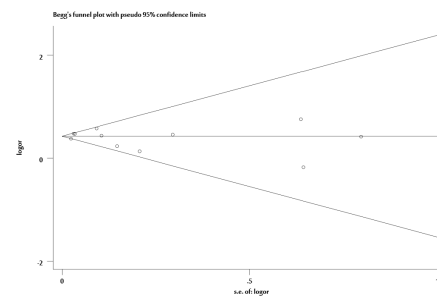

(f) Low birth weight

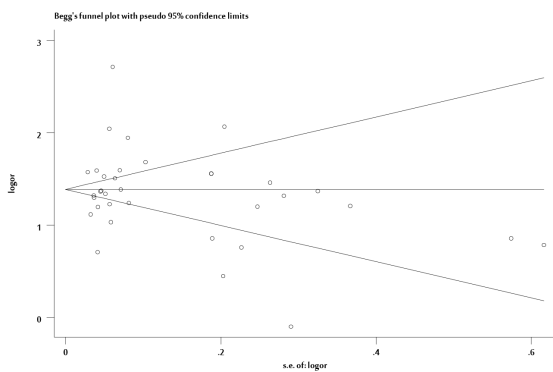

(g) Large for gestational age

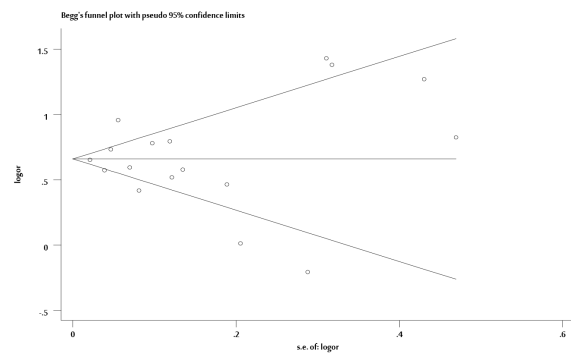

(h) Macrosomia

(Continued)

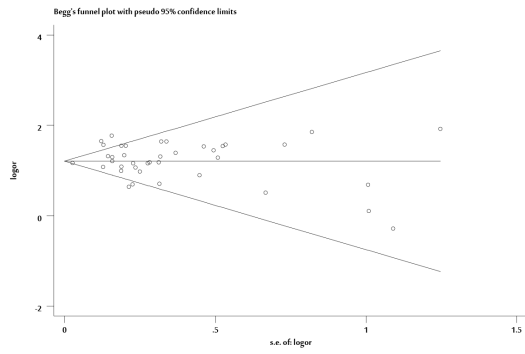

(i) Stillbirth

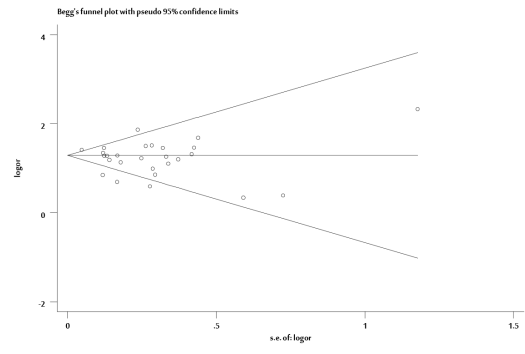

(j) Perinatal death

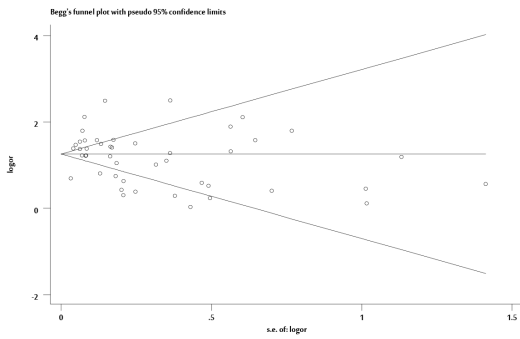

(k) Pre-eclampsia

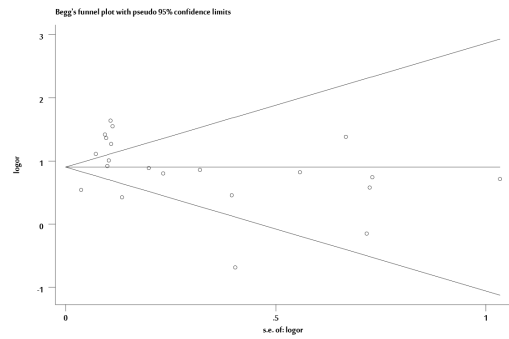

(l) Pregnancy induced hypertension

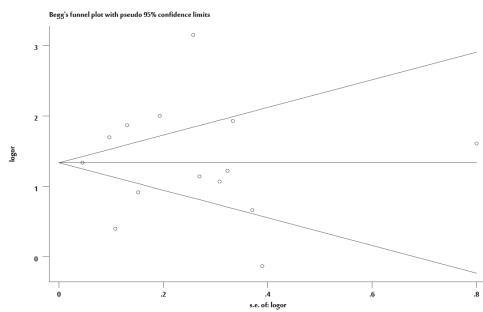

(m) NICU admission

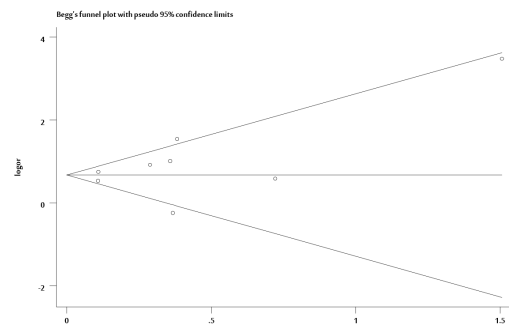

(n) Respiratory distress

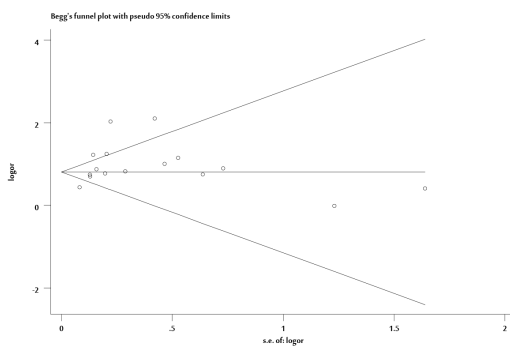

(o) Shoulder dystocia

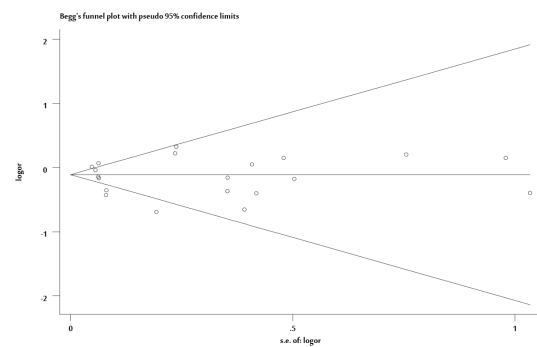

(p) Small for gestational age

(Continued)

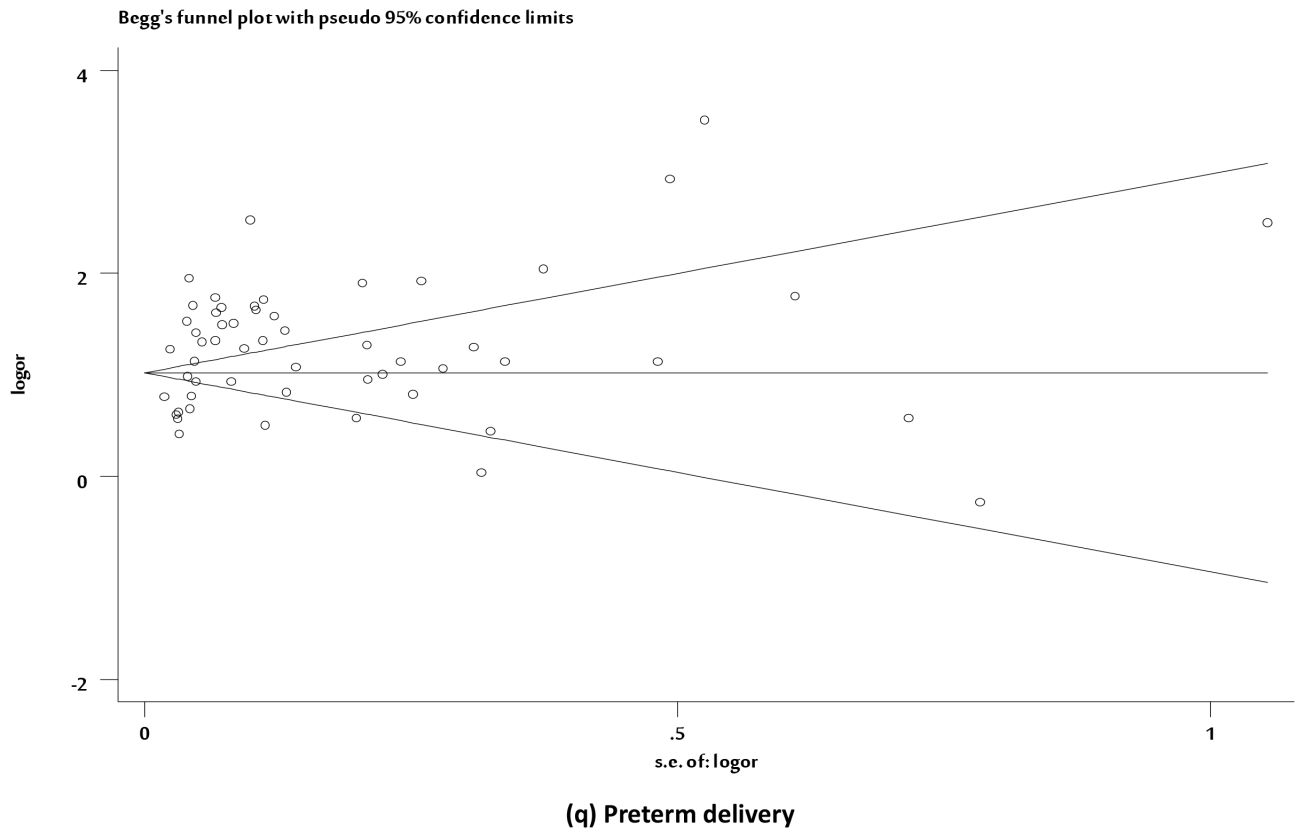

Supplementary Figure 2: Begg's funnel plot for pre-gestational diabetes and adverse pregnancy risk.

**Supplementary Table 1: Characteristics of the studies included in the meta-analysis**

See Supplementary File 1



**Supplementary Table 2: Associations of pre-gestational diabetes and adverse pregnancy outcomes stratified by sample size**

| Outcomes                            | Large study (no. PGD cases $\geq 1,000$ ) |                     |            |            | Medium sized study ( $500 \leq$ no. PGD cases $< 1,000$ ) |                     |            |            |
|-------------------------------------|-------------------------------------------|---------------------|------------|------------|-----------------------------------------------------------|---------------------|------------|------------|
|                                     | No. of datasets                           | OR (95% CI)         | P(Z)       | P(Q)       | No. of datasets                                           | OR (95% CI)         | P(Z)       | P(Q)       |
| Preterm delivery (< 37 weeks)       | 22                                        | 2.92 (2.46-3.46)    | $<10^{-5}$ | $<10^{-5}$ | 16                                                        | 4.24 (3.56-5.06)    | $<10^{-5}$ | $<10^{-5}$ |
| Macrosomia (> 4 kg)                 | 6                                         | 1.87 (1.73-2.01)    | $<10^{-5}$ | 0.005      | 4                                                         | 2.07 (1.67-2.56)    | $<10^{-5}$ | 0.002      |
| LGA (> 90 <sup>th</sup> percentile) | 17                                        | 4.27 (3.54-5.15)    | $<10^{-5}$ | $<10^{-5}$ | 7                                                         | 4.19 (3.63-4.83)    | $<10^{-5}$ | $<10^{-4}$ |
| LBW (< 2500 g)                      | 5                                         | 1.53 (1.43-1.64)    | $<10^{-5}$ | 0.02       | 2                                                         | 1.47 (0.96-2.26)    | 0.07       | 0.05       |
| SGA (< 10 <sup>th</sup> percentile) | 8                                         | 0.87 (0.78-0.98)    | 0.02       | $<10^{-5}$ | 3                                                         | 0.74 (0.50-1.10)    | 0.14       | 0.01       |
| Perinatal mortality                 | 11                                        | 3.35 (2.90-3.86)    | $<10^{-5}$ | 0.007      | 11                                                        | 3.49 (2.77-4.40)    | $<10^{-5}$ | 0.02       |
| Neonatal death                      | 10                                        | 1.87 (1.47-2.37)    | $<10^{-5}$ | 0.16       | 5                                                         | 2.36 (1.59-3.50)    | $<10^{-5}$ | 0.18       |
| Stillbirth                          | 17                                        | 3.31 (2.90-3.76)    | $<10^{-5}$ | $<10^{-4}$ | 13                                                        | 3.92 (3.35-4.58)    | $<10^{-5}$ | 0.24       |
| Pregnancy induced hypertension      | 7                                         | 2.84 (1.97-4.09)    | $<10^{-5}$ | $<10^{-5}$ | 4                                                         | 3.41 (2.68-4.33)    | $<10^{-5}$ | 0.003      |
| Pre-eclampsia                       | 16                                        | 4.03 (3.18-5.12)    | $<10^{-5}$ | $<10^{-5}$ | 14                                                        | 3.10 (2.47-3.89)    | $<10^{-5}$ | $<10^{-5}$ |
| Caesarean section                   | 14                                        | 3.04 (2.31-4.00)    | $<10^{-5}$ | $<10^{-5}$ | 10                                                        | 3.82 (2.82-5.18)    | $<10^{-5}$ | $<10^{-5}$ |
| Shoulder dystocia                   | 9                                         | 2.30 (1.86-2.84)    | $<10^{-5}$ | $<10^{-4}$ | 1                                                         | 7.62 (4.94-11.76)   | $<10^{-5}$ | NA         |
| NICU admission                      | 3                                         | 4.19 (3.08-5.70)    | $<10^{-5}$ | 0.002      | 3                                                         | 2.90 (1.21-6.95)    | 0.02       | $<10^{-5}$ |
| 5-minutes Apgar score < 7           | 7                                         | 2.37 (1.93-2.91)    | $<10^{-5}$ | 0.002      | 2                                                         | 3.32 (2.38-4.65)    | $<10^{-5}$ | 0.86       |
| Neonatal hypoglycemia               | 1                                         | 56.80 (50.55-63.83) | $<10^{-5}$ | NA         | 2                                                         | 49.04 (40.32-59.64) | $<10^{-5}$ | 0.35       |
| Respiratory distress                | 3                                         | 2.14 (1.54-2.98)    | $<10^{-4}$ | 0.03       | 1                                                         | 2.74 (1.36-5.53)    | 0.005      | NA         |

**Supplementary Table 3: Associations of pre-gestational diabetes and adverse pregnancy outcomes stratified by geographic region**

| Outcomes                            | North American  |                     |                   |                   | Europe          |                      |                   |                   | Oceania         |                    |                   |                   |
|-------------------------------------|-----------------|---------------------|-------------------|-------------------|-----------------|----------------------|-------------------|-------------------|-----------------|--------------------|-------------------|-------------------|
|                                     | No. of datasets | OR (95% CI)         | P(Z)              | P(Q)              | No. of datasets | OR (95% CI)          | P(Z)              | P(Q)              | No. of datasets | OR (95% CI)        | P(Z)              | P(Q)              |
| Preterm delivery (< 37 weeks)       | 16              | 3.26 (2.74-3.88)    | <10 <sup>-5</sup> | <10 <sup>-5</sup> | 22              | 4.28 (3.50-5.22)     | <10 <sup>-5</sup> | <10 <sup>-5</sup> | 6               | 3.95 (2.04-7.66)   | <10 <sup>-4</sup> | <10 <sup>-5</sup> |
| Macrosomia (> 4 kg)                 | 7               | 1.76 (1.58-1.96)    | <10 <sup>-5</sup> | 0.002             | 7               | 1.88 (1.52-2.34)     | <10 <sup>-5</sup> | <10 <sup>-4</sup> | NA              | NA                 | NA                | NA                |
| LGA (> 90 <sup>th</sup> percentile) | 10              | 3.64 (2.91-4.55)    | <10 <sup>-5</sup> | <10 <sup>-5</sup> | 19              | 4.14 (3.50-4.91)     | <10 <sup>-5</sup> | <10 <sup>-5</sup> | 4               | 4.07 (2.40-6.88)   | <10 <sup>-5</sup> | <10 <sup>-4</sup> |
| LBW (<2500 g)                       | 7               | 1.51 (1.41-1.61)    | <10 <sup>-5</sup> | 0.17              | 1               | 1.77 (1.48-2.12)     | <10 <sup>-5</sup> | NA                | 1               | 0.84 (0.24-2.95)   | 0.78              | NA                |
| SGA (< 10 <sup>th</sup> percentile) | 7               | 0.83 (0.70-0.99)    | 0.04              | <10 <sup>-4</sup> | 7               | 0.82 (0.76-0.88)     | <10 <sup>-5</sup> | 0.54              | 3               | 0.88 (0.41-1.89)   | 0.74              | 0.09              |
| Perinatal mortality                 | 2               | 3.85 (2.56-5.79)    | <10 <sup>-5</sup> | 0.36              | 20              | 3.43 (3.03-3.89)     | <10 <sup>-5</sup> | 0.001             | 3               | 2.58 (1.52-4.39)   | <10 <sup>-4</sup> | 0.27              |
| Neonatal death                      | 2               | 1.94 (1.24-3.03)    | 0.004             | 0.56              | 14              | 2.38 (1.76-3.24)     | <10 <sup>-5</sup> | <10 <sup>-4</sup> | 2               | 1.93 (0.45-8.30)   | 0.38              | 0.06              |
| Stillbirth                          | 10              | 3.22 (3.07-3.38)    | <10 <sup>-5</sup> | 0.51              | 21              | 3.90 (3.38-4.49)     | <10 <sup>-5</sup> | 0.008             | 4               | 2.59 (1.99-3.38)   | <10 <sup>-5</sup> | 0.37              |
| Pregnancy induced hypertension      | 9               | 3.27 (2.65-4.05)    | <10 <sup>-5</sup> | <10 <sup>-5</sup> | 7               | 1.77 (1.45-2.17)     | <10 <sup>-5</sup> | 0.77              | 3               | 2.00 (1.12-3.57)   | 0.02              | 0.12              |
| Pre-eclampsia                       | 12              | 3.53 (3.11-4.01)    | <10 <sup>-5</sup> | 0.008             | 25              | 3.99 (3.38-4.71)     | <10 <sup>-5</sup> | <10 <sup>-5</sup> | 4               | 2.62 (1.62-4.24)   | <10 <sup>-4</sup> | 0.003             |
| Caesarean section                   | 10              | 2.63 (2.12-3.27)    | <10 <sup>-5</sup> | <10 <sup>-5</sup> | 20              | 4.30 (3.67-5.04)     | <10 <sup>-5</sup> | <10 <sup>-5</sup> | 3               | 3.44 (2.29-5.19)   | <10 <sup>-5</sup> | 0.003             |
| Shoulder dystocia                   | 7               | 2.48 (1.79-3.43)    | <10 <sup>-5</sup> | <10 <sup>-4</sup> | 3               | 3.26 (2.49-4.28)     | <10 <sup>-5</sup> | 0.47              | 3               | 4.14 (2.35-7.29)   | <10 <sup>-5</sup> | 0.13              |
| NICU admission                      | 6               | 3.94 (2.19-7.09)    | <10 <sup>-4</sup> | <10 <sup>-4</sup> | 3               | 5.58 (3.68-8.47)     | <10 <sup>-5</sup> | 0.03              | 3               | 3.56 (1.92-6.59)   | <10 <sup>-4</sup> | 0.01              |
| 5-minutes Apgar score < 7           | 3               | 2.25 (1.56-3.24)    | <10 <sup>-4</sup> | 0.14              | 6               | 2.64 (2.19-3.19)     | <10 <sup>-5</sup> | 0.04              | 2               | 1.58 (0.54-4.57)   | 0.40              | 0.17              |
| Neonatal hypoglycemia               | 3               | 42.20 (28.15-63.25) | <10 <sup>-5</sup> | 0.06              | 2               | 36.17 (10.67-122.57) | <10 <sup>-5</sup> | 0.31              | 3               | 14.44 (2.96-70.58) | 0.001             | <10 <sup>-5</sup> |
| Jaundice                            | NA              | NA                  | NA                | NA                | 2               | 1.35 (0.77-2.36)     | 0.29              | 0.41              | 2               | 3.66 (1.88-7.13)   | <10 <sup>-4</sup> | 0.04              |

**Supplementary Table 4: Associations of pre-gestational diabetes and adverse pregnancy outcomes stratified by study quality**

| Outcomes                            | High quality study ( $\geq 7$ points) |                     |                   |                   | Medium quality study (5 to 6 points) |                     |                   |                   |
|-------------------------------------|---------------------------------------|---------------------|-------------------|-------------------|--------------------------------------|---------------------|-------------------|-------------------|
|                                     | No. of datasets                       | OR (95% CI)         | P(Z)              | P(Q)              | No. of datasets                      | OR (95% CI)         | P(Z)              | P(Q)              |
| Preterm delivery (< 37 weeks)       | 27                                    | 3.31 (2.79-3.92)    | <10 <sup>-5</sup> | <10 <sup>-5</sup> | 17                                   | 3.84 (3.22-4.58)    | <10 <sup>-5</sup> | <10 <sup>-5</sup> |
| Macrosomia (> 4 kg)                 | 7                                     | 2.00 (1.79-2.24)    | <10 <sup>-5</sup> | 0.005             | 7                                    | 1.95 (1.57-2.42)    | <10 <sup>-5</sup> | <10 <sup>-4</sup> |
| LGA (> 90 <sup>th</sup> percentile) | 20                                    | 4.18 (3.54-4.93)    | <10 <sup>-5</sup> | <10 <sup>-5</sup> | 7                                    | 4.68 (3.57-6.14)    | <10 <sup>-5</sup> | <10 <sup>-5</sup> |
| LBW (< 2500 g)                      | 6                                     | 1.55 (1.45-1.66)    | <10 <sup>-5</sup> | 0.02              | 3                                    | 1.22 (0.84-1.79)    | 0.29              | 0.32              |
| SGA (< 10 <sup>th</sup> percentile) | 9                                     | 0.83 (0.73-0.94)    | 0.004             | <10 <sup>-4</sup> | 5                                    | 1.05 (0.73-1.52)    | 0.80              | 0.34              |
| Perinatal mortality                 | 18                                    | 3.41 (2.98-3.91)    | <10 <sup>-5</sup> | <10 <sup>-4</sup> | 7                                    | 3.20 (2.49-4.12)    | <10 <sup>-5</sup> | 0.40              |
| Neonatal death                      | 12                                    | 1.90 (1.57-2.31)    | <10 <sup>-5</sup> | 0.21              | 6                                    | 4.66 (2.36-9.19)    | <10 <sup>-5</sup> | 0.04              |
| Stillbirth                          | 26                                    | 3.52 (3.14-3.94)    | <10 <sup>-5</sup> | <10 <sup>-4</sup> | 8                                    | 3.38 (2.62-4.37)    | <10 <sup>-5</sup> | 0.88              |
| Pregnancy induced hypertension      | 8                                     | 3.07 (2.18-4.31)    | <10 <sup>-5</sup> | <10 <sup>-5</sup> | 7                                    | 2.66 (2.11-3.35)    | <10 <sup>-5</sup> | 0.11              |
| Pre-eclampsia                       | 23                                    | 3.95 (3.28-4.75)    | <10 <sup>-5</sup> | <10 <sup>-5</sup> | 17                                   | 2.82 (2.17-3.68)    | <10 <sup>-5</sup> | <10 <sup>-5</sup> |
| Caesarean section                   | 18                                    | 3.53 (2.64-4.72)    | <10 <sup>-5</sup> | <10 <sup>-5</sup> | 12                                   | 3.38 (2.77-4.14)    | <10 <sup>-5</sup> | <10 <sup>-5</sup> |
| Shoulder dystocia                   | 8                                     | 2.18 (1.77-2.70)    | <10 <sup>-5</sup> | 0.001             | 4                                    | 5.02 (2.94-8.56)    | <10 <sup>-5</sup> | 0.02              |
| NICU admission                      | 2                                     | 3.79 (3.47-4.13)    | <10 <sup>-5</sup> | 0.38              | 7                                    | 2.70 (1.60-4.53)    | <10 <sup>-4</sup> | <10 <sup>-5</sup> |
| 5-minutes Apgar score < 7           | 8                                     | 2.44 (2.01-2.95)    | <10 <sup>-5</sup> | 0.003             | 5                                    | 2.57 (1.63-4.04)    | <10 <sup>-4</sup> | 0.32              |
| Neonatal hypoglycemia               | 1                                     | 43.06 (30.72-60.34) | <10 <sup>-5</sup> | NA                | 8                                    | 25.59 (11.39-57.50) | <10 <sup>-5</sup> | <10 <sup>-5</sup> |
| Respiratory distress                | 4                                     | 2.20 (1.64-2.95)    | <10 <sup>-5</sup> | 0.04              | 3                                    | 1.51 (0.65-3.49)    | 0.34              | 0.05              |
| Jaundice                            | NA                                    | NA                  | NA                | NA                | 2                                    | 2.66 (1.88-7.13)    | <10 <sup>-4</sup> | 0.04              |

**Supplementary Table 5: Associations of pre-gestational diabetes and adverse pregnancy outcomes stratified by adjustment**

| Outcomes                            | Adjusted study  |                   |                   |                   | Unadjusted study |                     |                   |                   |
|-------------------------------------|-----------------|-------------------|-------------------|-------------------|------------------|---------------------|-------------------|-------------------|
|                                     | No. of datasets | OR (95% CI)       | P(Z)              | P(Q)              | No. of datasets  | OR (95% CI)         | P(Z)              | P(Q)              |
| Preterm delivery (< 37 weeks)       | 23              | 3.00 (2.55-3.52)  | <10 <sup>-5</sup> | <10 <sup>-5</sup> | 32               | 3.98 (3.26-4.86)    | <10 <sup>-5</sup> | <10 <sup>-5</sup> |
| Macrosomia (> 4 kg)                 | 7               | 1.92 (1.74-2.12)  | <10 <sup>-5</sup> | 0.001             | 10               | 1.82 (1.48-2.22)    | <10 <sup>-5</sup> | <10 <sup>-4</sup> |
| LGA (> 90 <sup>th</sup> percentile) | 12              | 4.26 (3.47-5.23)  | <10 <sup>-5</sup> | <10 <sup>-5</sup> | 23               | 3.71 (3.12-4.42)    | <10 <sup>-5</sup> | <10 <sup>-5</sup> |
| LBW (< 2500 g)                      | 5               | 1.53 (1.43-1.64)  | <10 <sup>-5</sup> | 0.02              | 7                | 1.50 (1.19-1.90)    | 0.001             | 0.29              |
| SGA (< 10 <sup>th</sup> percentile) | 6               | 0.75 (0.57-1.01)  | 0.05              | <10 <sup>-4</sup> | 14               | 0.91 (0.82-1.01)    | 0.07              | 0.01              |
| Perinatal mortality                 | 12              | 2.98 (2.46-3.62)  | <10 <sup>-5</sup> | <10 <sup>-4</sup> | 15               | 3.77 (3.38-4.21)    | <10 <sup>-5</sup> | 0.58              |
| Neonatal death                      | 8               | 1.92 (1.45-2.56)  | <10 <sup>-5</sup> | 0.18              | 11               | 2.62 (1.72-4.00)    | <10 <sup>-5</sup> | <10 <sup>-4</sup> |
| Stillbirth                          | 15              | 3.14 (2.82-3.50)  | <10 <sup>-5</sup> | 0.46              | 24               | 3.84 (3.31-4.46)    | <10 <sup>-5</sup> | <10 <sup>-5</sup> |
| Pregnancy induced hypertension      | 8               | 2.48 (1.74-3.53)  | <10 <sup>-5</sup> | <10 <sup>-5</sup> | 13               | 2.74 (2.16-3.47)    | <10 <sup>-5</sup> | <10 <sup>-4</sup> |
| Pre-eclampsia                       | 23              | 3.39 (2.78-4.13)  | <10 <sup>-5</sup> | <10 <sup>-5</sup> | 25               | 3.61 (2.93-4.43)    | <10 <sup>-5</sup> | <10 <sup>-5</sup> |
| Caesarean section                   | 17              | 3.14 (2.43-4.07)  | <10 <sup>-5</sup> | <10 <sup>-5</sup> | 25               | 3.80 (3.18-4.54)    | <10 <sup>-5</sup> | <10 <sup>-5</sup> |
| Shoulder dystocia                   | 10              | 2.37 (1.89-2.99)  | <10 <sup>-5</sup> | <10 <sup>-4</sup> | 6                | 3.80 (2.21-6.53)    | <10 <sup>-4</sup> | 0.05              |
| NICU admission                      | 4               | 3.41 (2.69-4.32)  | <10 <sup>-5</sup> | 0.25              | 10               | 4.32 (2.65-7.05)    | <10 <sup>-5</sup> | <10 <sup>-5</sup> |
| 5-minutes Apgar score < 7           | 9               | 2.20 (1.96-2.47)  | <10 <sup>-5</sup> | 0.47              | 4                | 3.30 (2.85-3.81)    | <10 <sup>-5</sup> | 0.97              |
| Neonatal hypoglycemia               | 2               | 7.29 (3.53-15.07) | <10 <sup>-5</sup> | 0.04              | 9                | 50.16 (41.21-61.06) | <10 <sup>-5</sup> | 0.18              |
| Respiratory distress                | 5               | 1.97 (1.42-2.73)  | <10 <sup>-4</sup> | 0.006             | 3                | 3.04 (1.17-7.94)    | 0.02              | 0.22              |
| Jaundice                            | 2               | 3.66 (1.88-7.13)  | <10 <sup>-4</sup> | 0.04              | 4                | 2.28 (1.00-5.22)    | 0.05              | 0.09              |

Supplementary Table 6: P-value of covariates in meta-regression analysis

| Outcomes                            | Study design               | Geographic region          | Sample size  | Term | Adjustment                 | Study quality | Publication year |
|-------------------------------------|----------------------------|----------------------------|--------------|------|----------------------------|---------------|------------------|
| Preterm delivery (< 37 weeks)       | 0.43                       | <b>0.002</b>               | 0.06         | 0.98 | <b>0.03</b>                | 0.55          | 0.09             |
| Shoulder dystocia                   | 0.71                       | 0.95                       | 0.07         | 0.61 | <b>0.04</b>                | 0.06          | 0.14             |
| Macrosomia (> 4 kg)                 | 0.94                       | 0.82                       | 0.93         | 0.79 | 0.42                       | 0.37          | 0.17             |
| LGA (> 90 <sup>th</sup> percentile) | 0.99                       | 0.31                       | 0.12         | 0.47 | 0.64                       | <b>0.04</b>   | 0.06             |
| LBW (< 2500 g)                      | 0.27                       | 0.50                       | 0.86         | 0.55 | 0.69                       | 0.33          | 0.40             |
| SGA (< 10 <sup>th</sup> percentile) | 0.59                       | 0.20                       | 0.97         | 0.99 | 0.17                       | 0.40          | 0.60             |
| Perinatal mortality                 | 0.56                       | 0.43                       | 0.84         | 0.92 | 0.09                       | 0.71          | 0.49             |
| Neonatal death                      | 0.94                       | 0.90                       | <b>0.001</b> | 0.80 | 0.28                       | <b>0.001</b>  | 0.05             |
| Stillbirth                          | <b>&lt;10<sup>-4</sup></b> | <b>&lt;10<sup>-4</sup></b> | 0.17         | 0.69 | <b>0.03</b>                | 0.78          | 0.29             |
| NICU admission                      | 0.84                       | 0.40                       | 0.75         | 0.95 | 0.44                       | 0.13          | 0.88             |
| Pregnancy induced hypertension      | 0.32                       | 0.91                       | 0.08         | 0.76 | 0.86                       | 0.20          | 0.10             |
| Pre-eclampsia                       | 0.56                       | 0.67                       | <b>0.01</b>  | 0.46 | 0.59                       | 0.29          | 0.07             |
| Caesarean section                   | 0.99                       | 0.07                       | 0.14         | 0.87 | 0.11                       | 0.84          | 0.18             |
| 5-minutes Apgar score < 7           | 0.45                       | 0.16                       | 0.84         | 0.93 | <b>&lt;10<sup>-4</sup></b> | 0.36          | 0.05             |
| Neonatal hypoglycemia               | <b>&lt;10<sup>-5</sup></b> | 0.58                       | 0.05         | 0.65 | <b>&lt;10<sup>-5</sup></b> | 0.55          | 0.65             |
| Respiratory distress                | 0.56                       | 0.86                       | 0.13         | 0.88 | 0.56                       | 0.59          | 0.81             |
| Jaundice                            | 0.29                       | <b>0.02</b>                | NA           | 0.91 | 0.29                       | 0.94          | 0.37             |

Supplementary Table 7: P-value of publication bias analysis

| Outcomes                            | Egger's test | Begg's test |
|-------------------------------------|--------------|-------------|
| Preterm delivery (< 37 weeks)       | 0.21         | 0.48        |
| Shoulder dystocia                   | 0.12         | 0.79        |
| Macrosomia (>4 kg)                  | 0.97         | 0.93        |
| LGA (> 90 <sup>th</sup> percentile) | 0.89         | 0.91        |
| LBW (< 2500 g)                      | 0.56         | 0.27        |
| SGA (< 10 <sup>th</sup> percentile) | 0.52         | 0.95        |
| Perinatal mortality                 | 0.15         | 0.88        |
| Neonatal death                      | 0.77         | 0.73        |
| Stillbirth                          | 0.43         | 0.65        |
| NICU admission                      | 0.90         | 0.48        |
| Pregnancy induced hypertension      | 0.42         | 0.25        |
| Pre-eclampsia                       | 0.78         | 0.53        |
| Caesarean section                   | 0.10         | 0.12        |
| 5-minutes Apgar score < 7           | 0.34         | 0.63        |
| Neonatal hypoglycemia               | 0.16         | 0.59        |
| Respiratory distress                | 0.38         | 0.22        |
| Jaundice                            | 0.86         | 0.85        |
